# Supplementary material for: Gold–nickel phosphide heterostructures for efficient photocatalytic hydrogen peroxide production from real seawater
Source: Royal Society of Chemistry journal article supplement (doi:10.1039/d2qi02662g), 2023-01-01
Supplement: d2qi02662g1.pdf [file d2qi02662g1.pdf]

## Supporting Information

### **Gold-Nickel Phosphide Heterostructures for Efficient Photocatalytic Hydrogen Peroxide Production from Real Seawater**

Wei Wang,<sup>a,b</sup> Qiang Luo,<sup>\*b</sup> Jinyang Li,<sup>b</sup> Yunhong Li,<sup>b</sup> Linqian Li,<sup>b</sup> Xiaobing Huo,<sup>b</sup>  
Xiwen Du,<sup>a</sup> Ning Wang<sup>\*b</sup>

*<sup>a</sup>Institute of New Energy Materials, School of Materials Science and Engineering,  
Tianjin University, Tianjin, 300072, P. R. China*

*<sup>b</sup>State Key Laboratory of Marine Resource Utilization in South China Sea, Hainan  
University, Haikou, 570228, P. R. China*

\*Corresponding author

E-mail: [luo-q11@foxmail.com](mailto:luo-q11@foxmail.com)

[wangn02@foxmail.com](mailto:wangn02@foxmail.com)

### The calculation of HOMO and LUMO levels.

The HOMO and LUMO are calculated as follows:

$$E_{HOMO} = - (E_{onset}^{ox} - E_{ferrocene} + 4.8) eV$$

$$E_{LUMO} = - (E_{onset}^{red} - E_{ferrocene} + 4.8) eV$$

Where  $E_{onset}^{red}$ ,  $E_{onset}^{ox}$  and  $E_{ferrocene}$  are the reduction potential, onset of oxidation and the oxidation potential of ferrocene, respectively <sup>1,2</sup>.

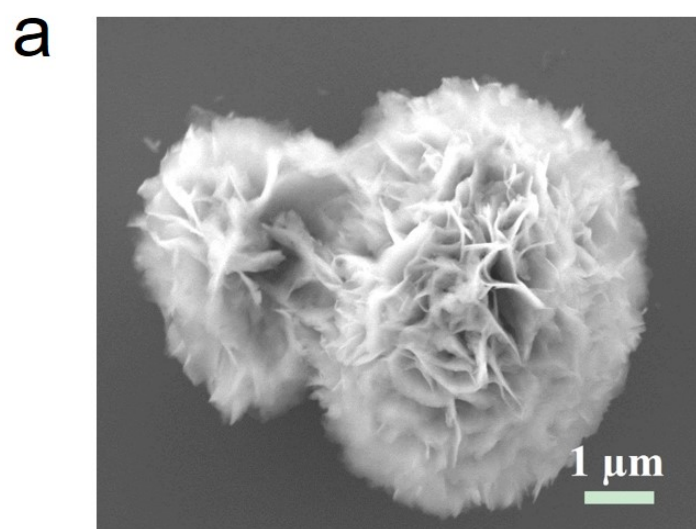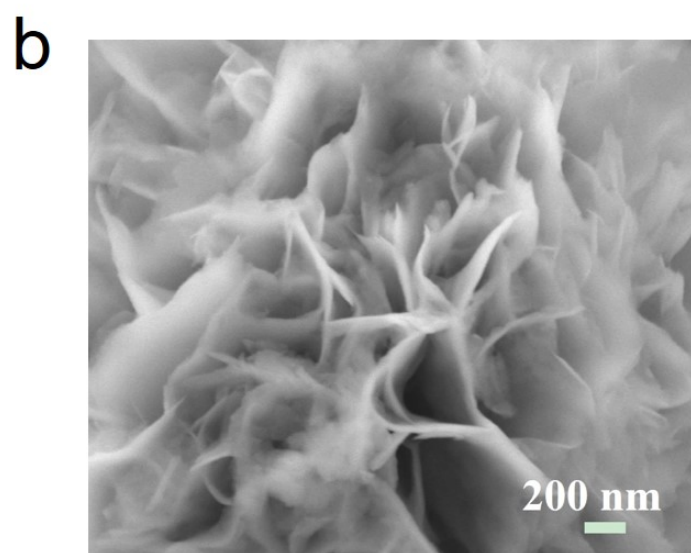

**Fig. S1** SEM images of Ni(OH)<sub>2</sub> precursor.

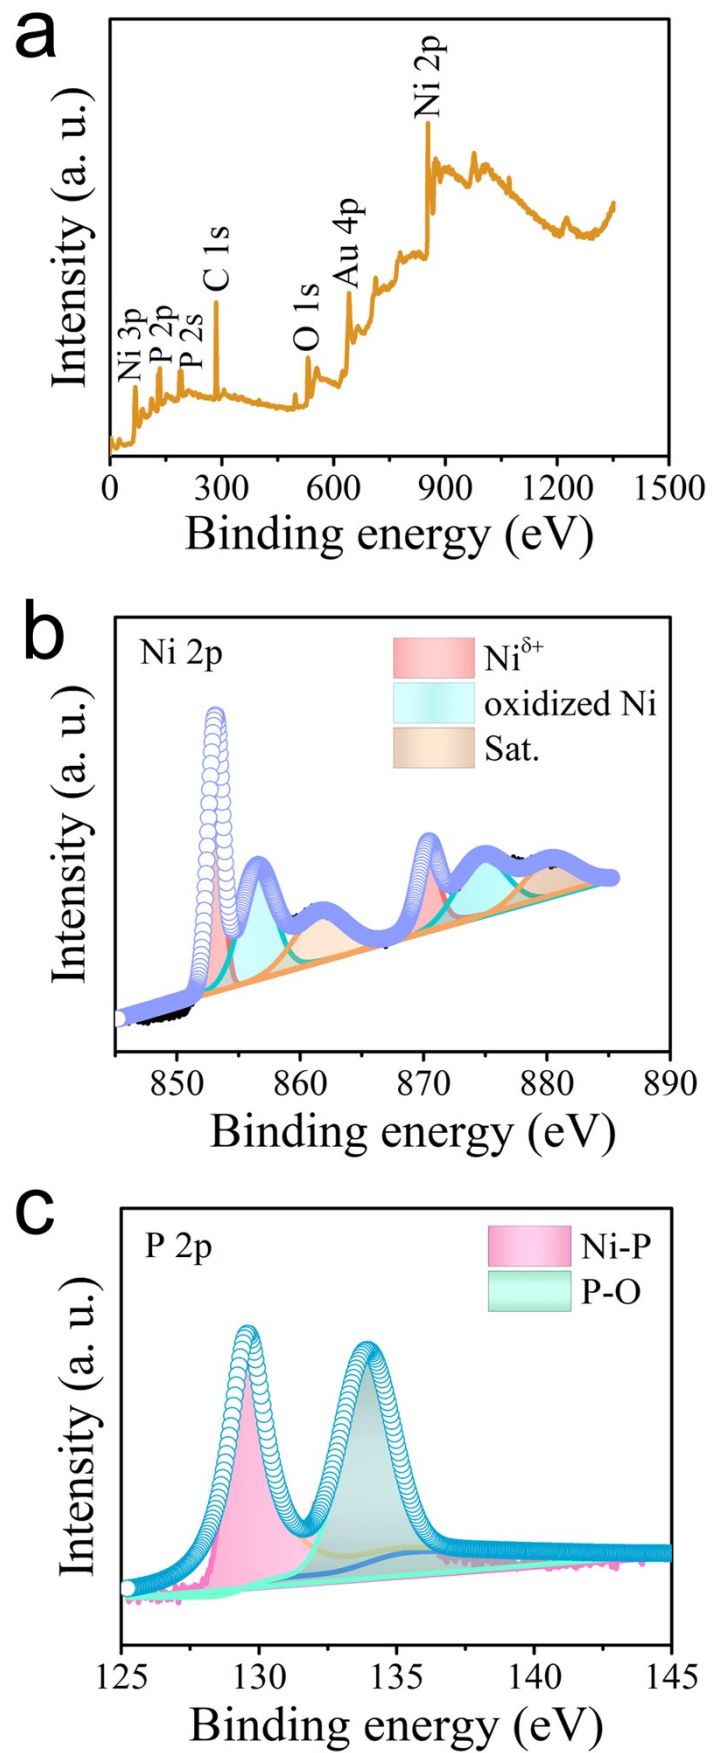

**Fig. S2** XPS spectra of Au@Ni<sub>5</sub>P<sub>4</sub>. (a) survey, (b) Ni 2p and (c) P 2p, respectively.

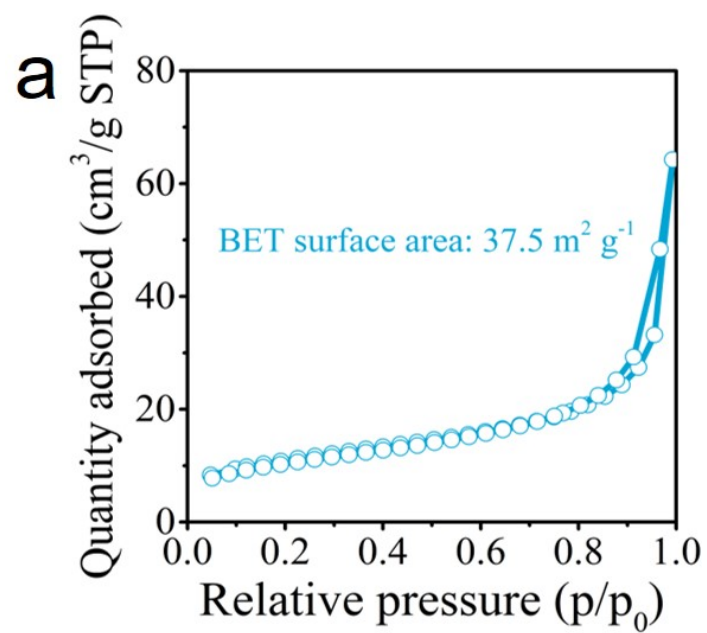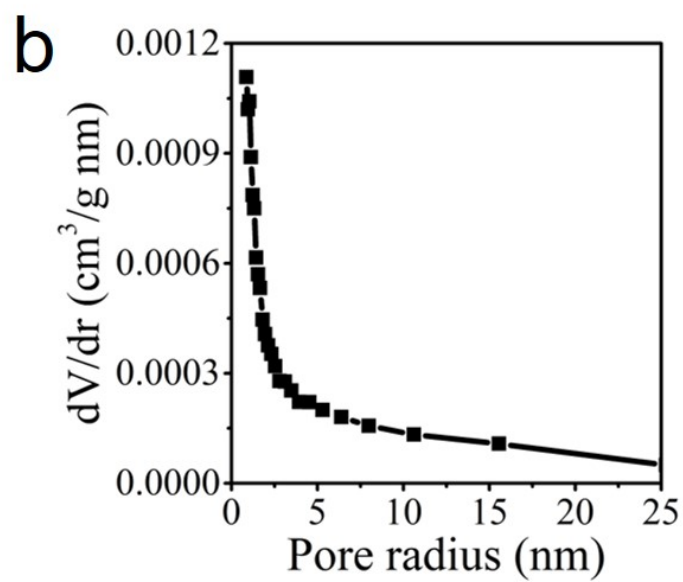

**Fig. S3** (a) Nitrogen adsorption-desorption isotherms of  $\text{Ni}_5\text{P}_4$ , and (b) The corresponding pore size distribution.

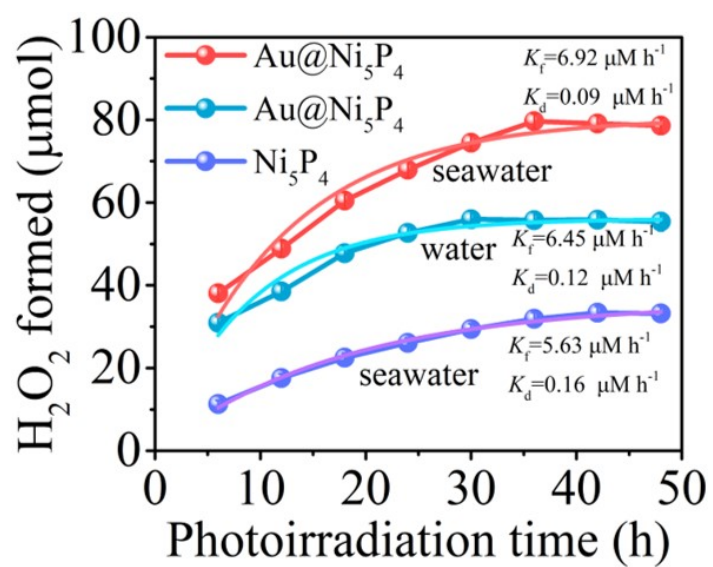

**Fig. S4** Time course of H<sub>2</sub>O<sub>2</sub> photoproduction and the corresponding fitting curves of Au@Ni<sub>5</sub>P<sub>4</sub> and Ni<sub>5</sub>P<sub>4</sub> in real seawater or water, respectively.

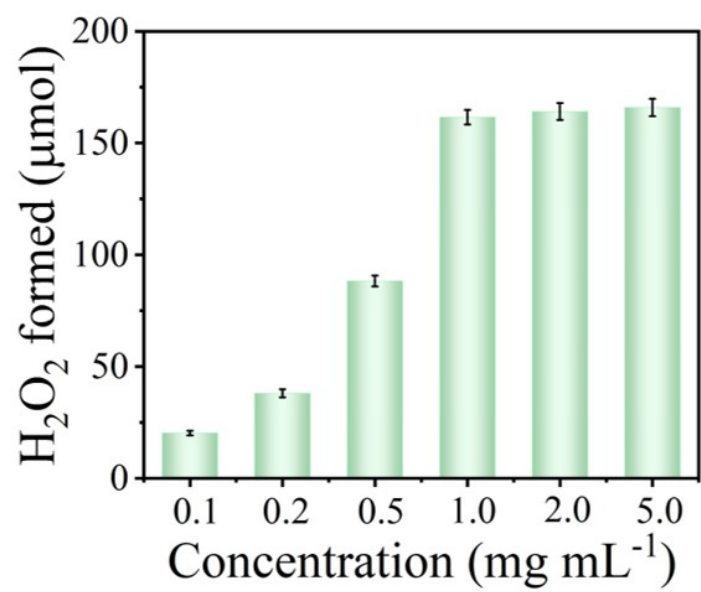

**Fig. S5** The photocatalytic production of H<sub>2</sub>O<sub>2</sub> as a function of mass concentration of

Au@Ni<sub>5</sub>P<sub>4</sub>.

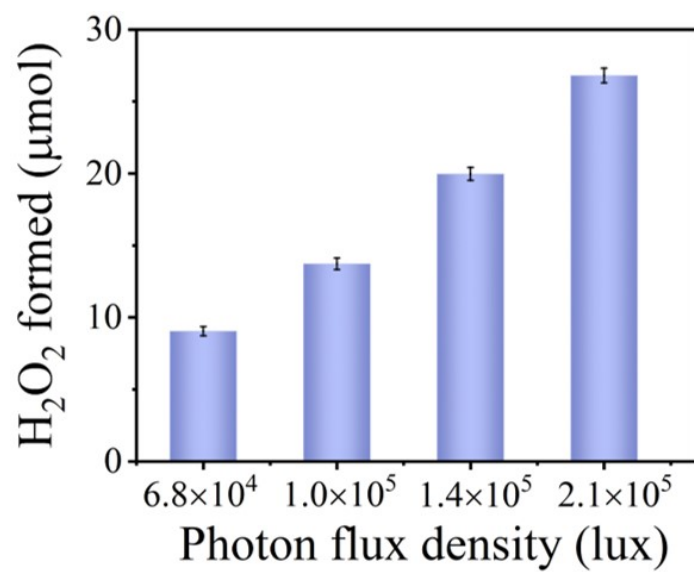

**Fig. S6** Photocatalytic H<sub>2</sub>O<sub>2</sub> production on Au@Ni<sub>5</sub>P<sub>4</sub> under different light intensity

for 6 h.



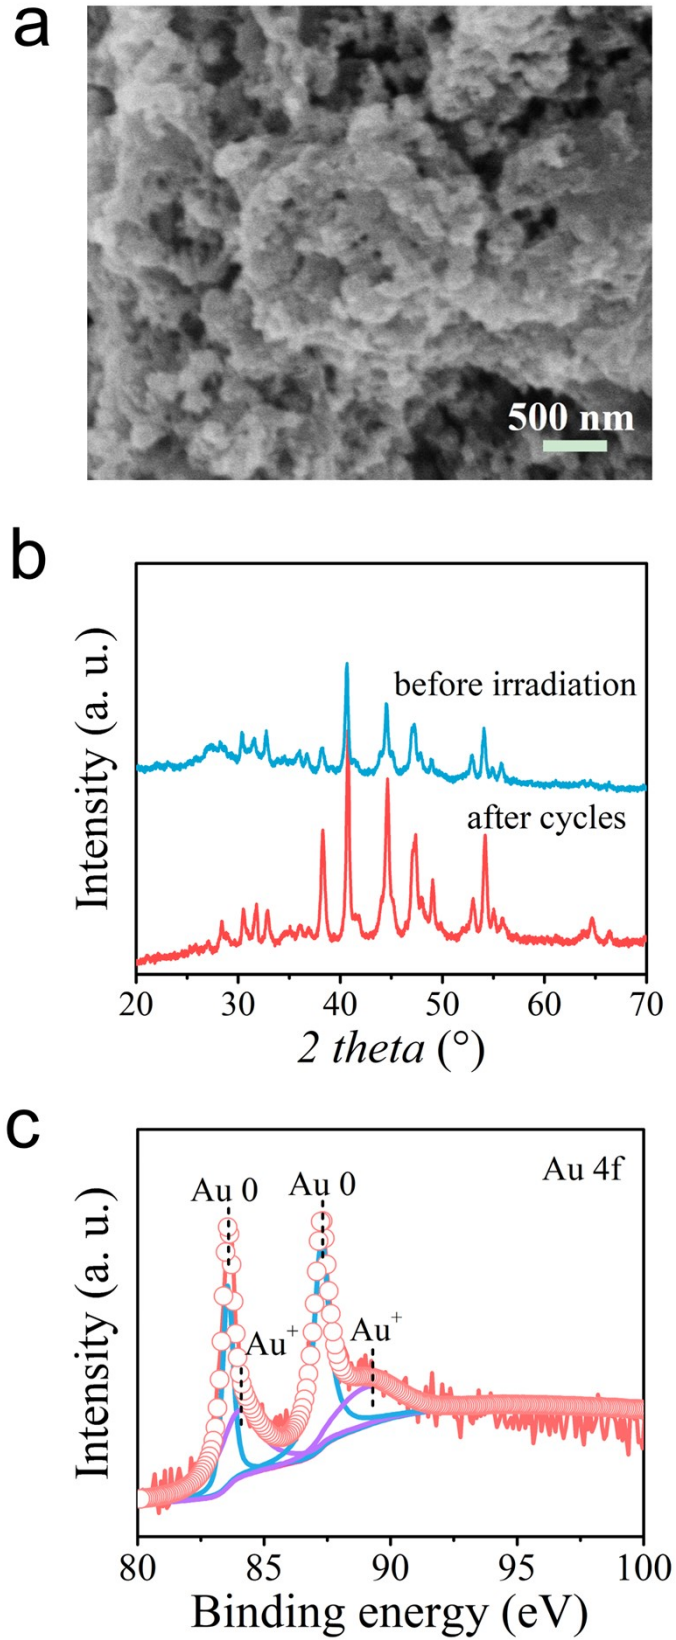

**Fig. S7** Stability characterizations of Au@Ni<sub>5</sub>P<sub>4</sub> after fifteen cycles of photocatalytic reaction. (a) SEM image. (b) XRD pattern, and (c) High-resolution XPS spectra of Au 4f.

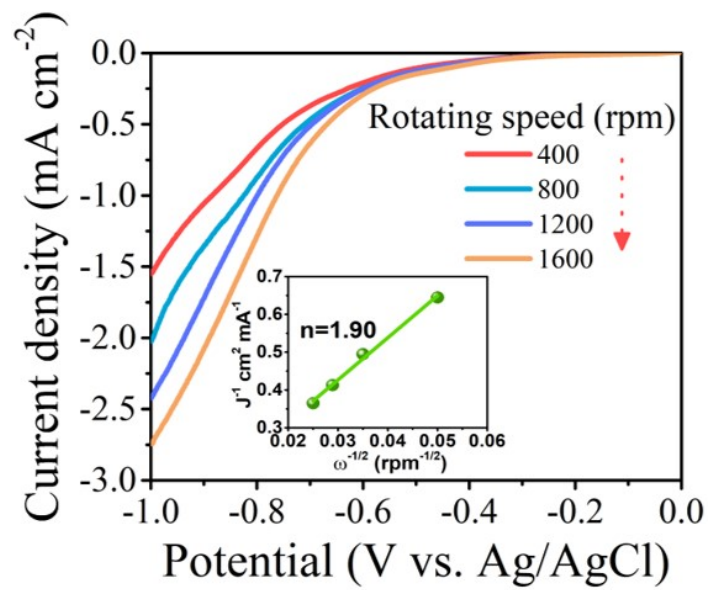

**Fig. S8** LSV curves of  $\text{Ni}_5\text{P}_4$  measured on RDE at different rotating speeds. Inset: the corresponding Koutecky-Levich plot.

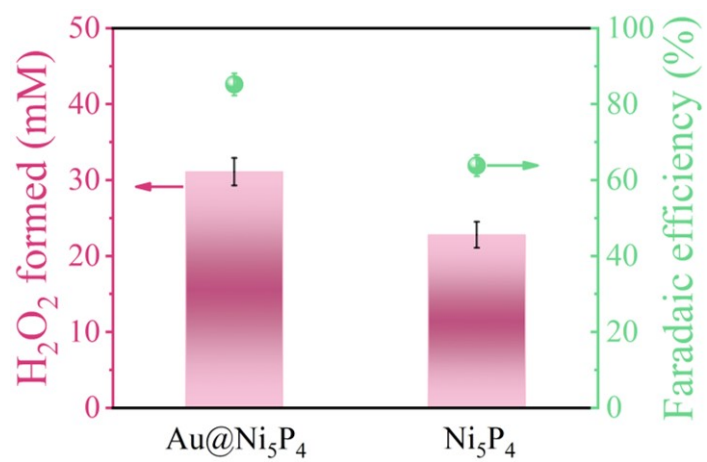

**Fig. S9** Concentrations of H<sub>2</sub>O<sub>2</sub> formed and the Faradaic efficiency of Au@Ni<sub>5</sub>P<sub>4</sub> and Ni<sub>5</sub>P<sub>4</sub> cathodes at 50 mA cm<sup>-2</sup>.

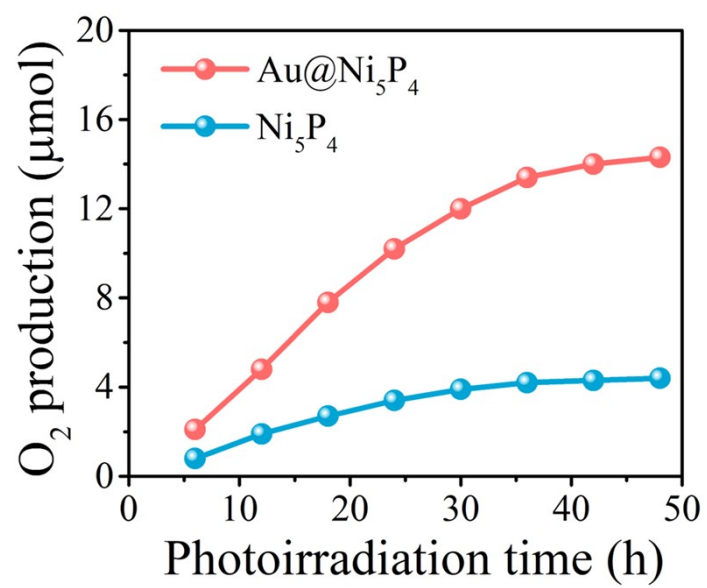

**Fig. S10** Amounts of O<sub>2</sub> formed during the half photoreaction.

**Table S1** EXAFS fitting parameters at the Au  $L_3$ -edge for various samples

| Sample                            | Shell | $CN^a$       | $R(\text{\AA})^b$ | $\sigma^2(\text{\AA}^2)^c$ | $\Delta E_0(\text{eV})^d$ | $R$ factor |
|-----------------------------------|-------|--------------|-------------------|----------------------------|---------------------------|------------|
| Au foil                           | Au-Au | 12*          | $2.86\pm 0.03$    | $0.0075\pm 0.0004$         | $4.6\pm 0.4$              | 0.0065     |
| AuCl <sub>3</sub>                 | Au-Cl | $4.1\pm 0.7$ | $2.31\pm 0.02$    | $0.0038\pm 0.0031$         | $-6.2\pm 1.6$             | 0.0078     |
| Au@Ni <sub>5</sub> P <sub>4</sub> | Au-P  | $1.1\pm 0.5$ | $2.34\pm 0.01$    | $0.0090\pm 0.0046$         | $9.5\pm 2.4$              | 0.0179     |
|                                   | Au-Au | $7.8\pm 1.9$ | $2.85\pm 0.04$    | $0.0077\pm 0.0018$         | $4.1\pm 1.2$              |            |

<sup>a</sup> $CN$ , coordination number; <sup>b</sup> $R$ , distance between absorber and backscatter atoms; <sup>c</sup> $\sigma^2$ , Debye-Waller factor to account for both thermal and structural disorders; <sup>d</sup> $\Delta E_0$ , inner potential correction;  $R$  factor indicates the goodness of the fit.  $S_0^2$  was fixed to 0.78, according to the experimental EXAFS fit of Au foil by fixing  $CN$  as the known crystallographic value. A reasonable range of EXAFS fitting parameters:  $0.700 < S_0^2 < 1.000$ ;  $CN > 0$ ;  $\sigma^2 > 0 \text{ \AA}^2$ ;  $|\Delta E_0| < 10 \text{ eV}$ ;  $R \text{ factor} < 0.02$ .

**Table S2** TRPL data of Au@Ni<sub>5</sub>P<sub>4</sub> and Ni<sub>5</sub>P<sub>4</sub>.

| Samples                           | $\tau_1/\text{ns}$ (A <sub>1</sub> ) | $\tau_2/\text{ns}$ (A <sub>2</sub> ) | $\tau_A/\text{ns}$ |
|-----------------------------------|--------------------------------------|--------------------------------------|--------------------|
| Au@Ni <sub>5</sub> P <sub>4</sub> | 0.88 (64.8%)                         | 6.54 (35.2%)                         | 5.42               |
| Ni <sub>5</sub> P <sub>4</sub>    | 0.76 (67.3%)                         | 4.53 (32.7%)                         | 3.56               |

## References

- 1 Y. Liu, Y. Zhao, Y. Sun, J. Cao, H. Wang, X. Wang, H. Huang, M. Shao, Y. Liu and Z. Kang, A  $4e^-$ - $2e^-$  cascaded pathway for highly efficient production of  $H_2$  and  $H_2O_2$  from water photo-splitting at normal pressure, *Appl. Catal. B: Environ.*, 2020, **270**, 118875.
- 2 Y. Liu, Y. Zhao, Q. Wu, X. Wang, H. Nie, Y. Zhou, H. Huang, M. Shao, Y. Liu and Z. Kang, Charge storage of carbon dot enhances photo-production of  $H_2$  and  $H_2O_2$  over  $Ni_2P$ /carbon dot catalyst under normal pressure, *Chem. Eng. J.*, 2021, **409**, 128184.
